# Supplementary material for: Increased Intraspecies Diversity in Escherichia coli Biofilms Promotes Cellular Growth at the Expense of Matrix Production
Source: MDPI journal article supplement (doi:10.3390/antibiotics9110818), 2020-11-17
Supplement: s1 [file s1]

## Supplemental material

### Tables

**Table S1.** Number of possible combinations (P) of the six different *E. coli* strains used for biofilms formation assays.

| Number of strains in the consortium |             |                |                 |                   |                     |
|-------------------------------------|-------------|----------------|-----------------|-------------------|---------------------|
| One strain                          | Two strains | Three strains  | Four strains    | Five strains      | Six strains         |
| P1 – UI1                            | P7 – UI1;2  | P22 – UI1;2;3  | P42 – UI1;2;3;4 | P57 – UI1;2;3;4;5 | P63 – UI1;2;3;4;5;6 |
| P2 – UI2                            | P8 – UI1;3  | P23 – UI1;2;4  | P43 – UI1;2;3;5 | P58 – UI1;2;3;4;6 |                     |
| P3 – UI3                            | P9 – UI1;4  | P24 – UI1;2;5  | P44 – UI1;2;3;6 | P59 – UI1;2;3;5;6 |                     |
| P4 – UI4                            | P10 – UI1;5 | P25 – UI1;2;6  | P45 – UI1;3;4;5 | P60 – UI1;2;4;5;6 |                     |
| P5 – UI5                            | P11 – UI1;6 | P26 – UI1;3;4  | P46 – UI1;3;4;6 | P61 – UI1;3;4;5;6 |                     |
| P6 – UI6                            | P12 – UI2;3 | P27 – UI1;3;5  | P47 – UI1;3;5;6 | P62 – UI2;3;4;5;6 |                     |
|                                     | P13 – UI2;4 | P28 – UI1;3;6  | P48 – UI1;4;5;6 |                   |                     |
|                                     | P14 – UI2;5 | P29 – UI1;4;5  | P49 – UI1;2;5;6 |                   |                     |
|                                     | P15 – UI2;6 | P30 – UI1;4;6  | P50 – UI1;2;4;5 |                   |                     |
|                                     | P16 – UI3;4 | P31 – UI1;5;6  | P51 – UI1;2;4;6 |                   |                     |
|                                     | P17 – UI3;5 | P32 – UI2;3;4; | P52 – UI2;3;4;5 |                   |                     |
|                                     | P18 – UI3;6 | P33 – UI2;3;5  | P53 – UI2;3;4;6 |                   |                     |
|                                     | P19 – UI4;5 | P34 – UI2;3;6  | P54 – UI2;4;5;6 |                   |                     |
|                                     | P20 – UI4;6 | P35 – UI2;4;5  | P55 – UI3;4;5;6 |                   |                     |
|                                     | P21 – UI5;6 | P36 – UI2;4;6  | P56 – UI2;3;5;6 |                   |                     |
|                                     |             | P37 – UI2;5;6  |                 |                   |                     |
|                                     |             | P38 – UI3;4;5  |                 |                   |                     |
|                                     |             | P39 – UI3;4;6  |                 |                   |                     |
|                                     |             | P40 – UI3;5;6  |                 |                   |                     |
|                                     |             | P41 – UI4;5;6  |                 |                   |                     |

Possible combinations (P)

## Figures

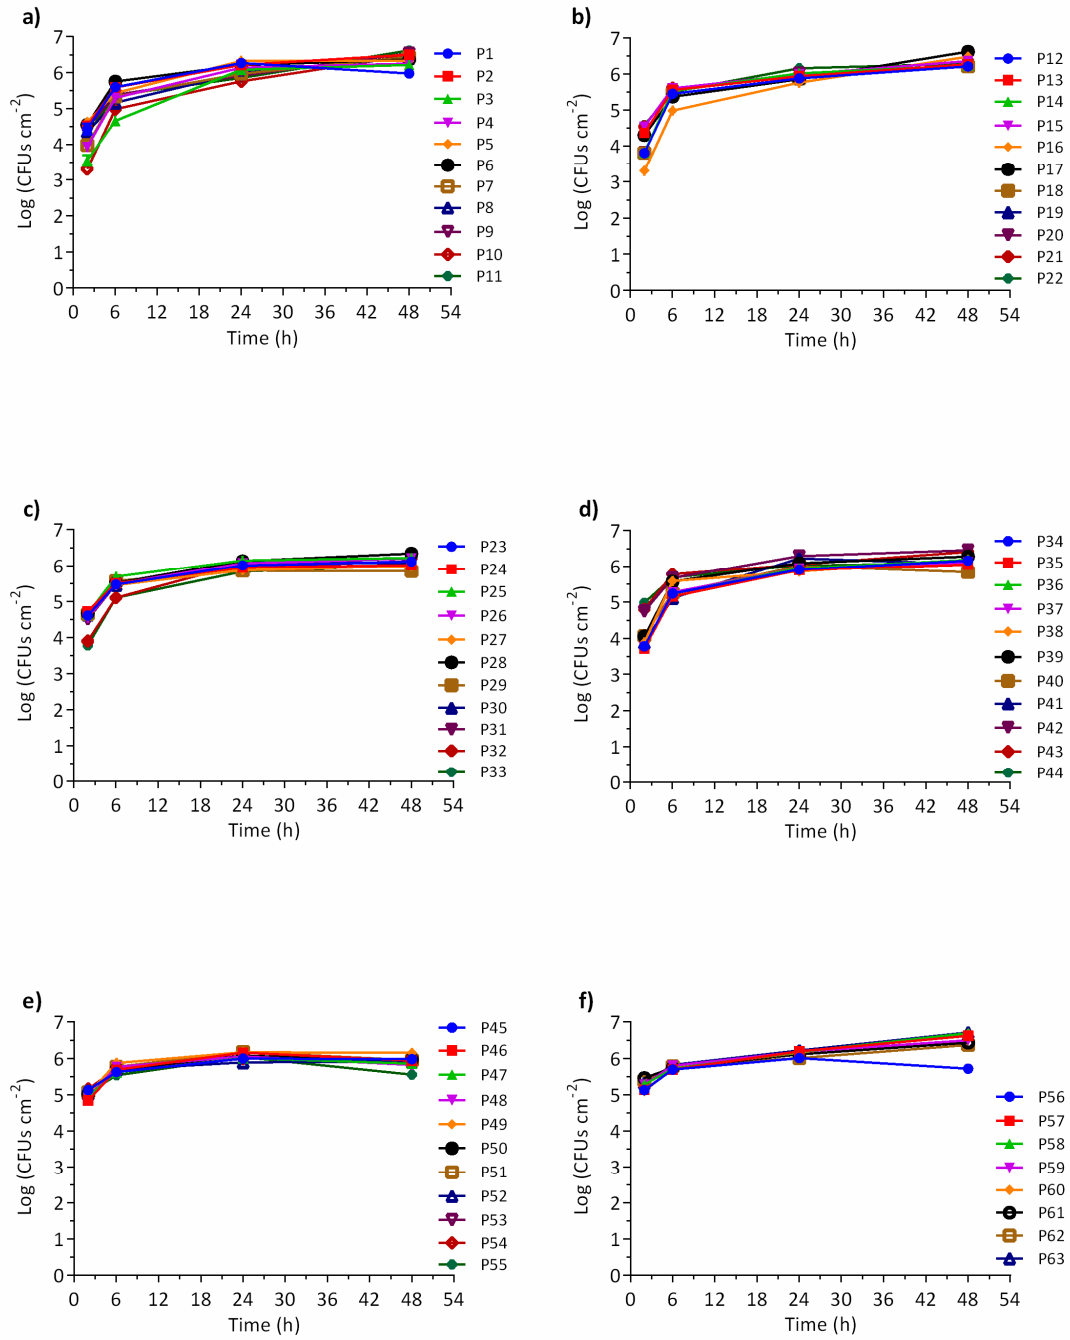

**Figure S1.** Number of cultivable cells in single-strain biofilms and in multi-strain biofilms combining two, three, four, five and six *E. coli* strains, during 48 h. Standard deviations of three independent replicates are displayed.

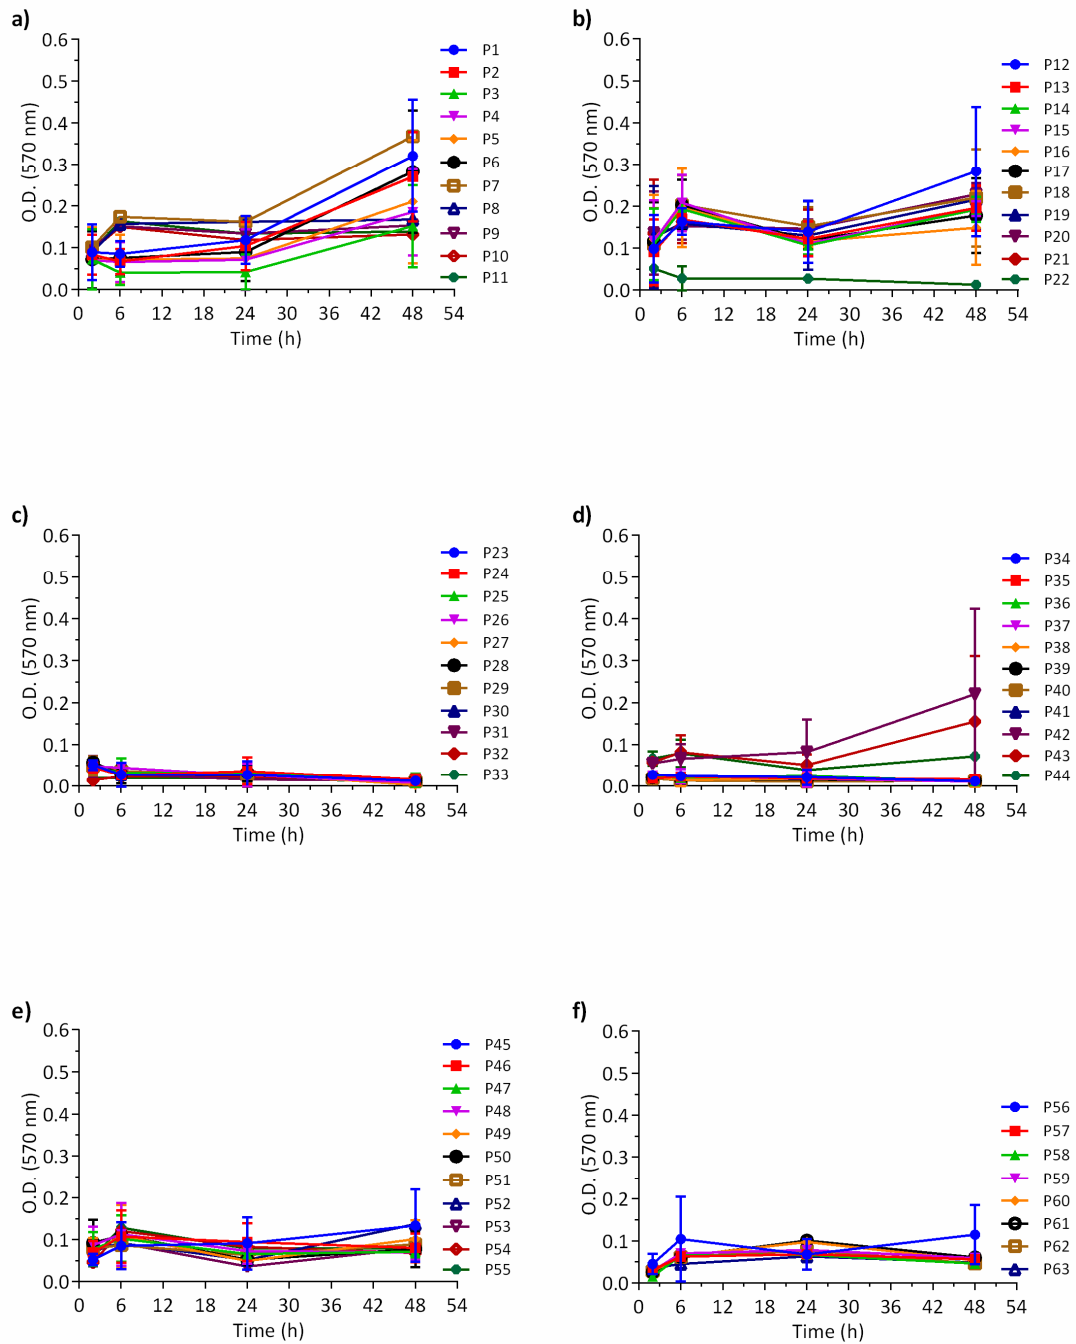

**Figure S2.** O.D. values for total biomass quantification (CV method) for single-strain biofilms and for multi-strain biofilms combining two, three, four, five and six *E. coli* strains, during 48 h. Standard deviations of three independent replicates are displayed.

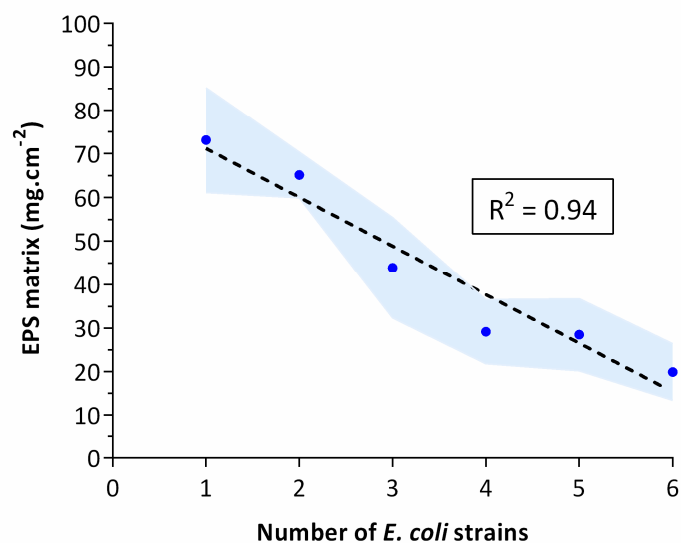

**Figure S3.** Mean EPS matrix concentration  $\pm$  standard deviation of biofilms formed by consortia of 1 up to 6 different *E. coli* strains after 48 h of incubation at 37 °C in AUM. The produced EPS matrix decreases linearly with the addition of strains in consortia, adjusted with an R-squared of 0.94.

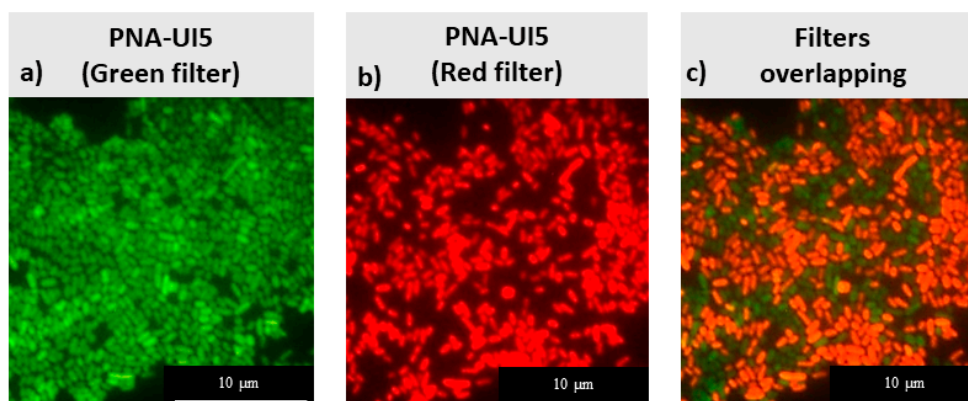

**Figure S4.** Multiplex FISH using both PNA-UI5 and PNA-UI126 probes using UI5 and UI2, respectively, at 50 °C hybridization temperature and 30 % formamide concentration. a – Green filter; b – Red filter; c – Filters overlapping. A magnification of 1500  $\times$  was used.

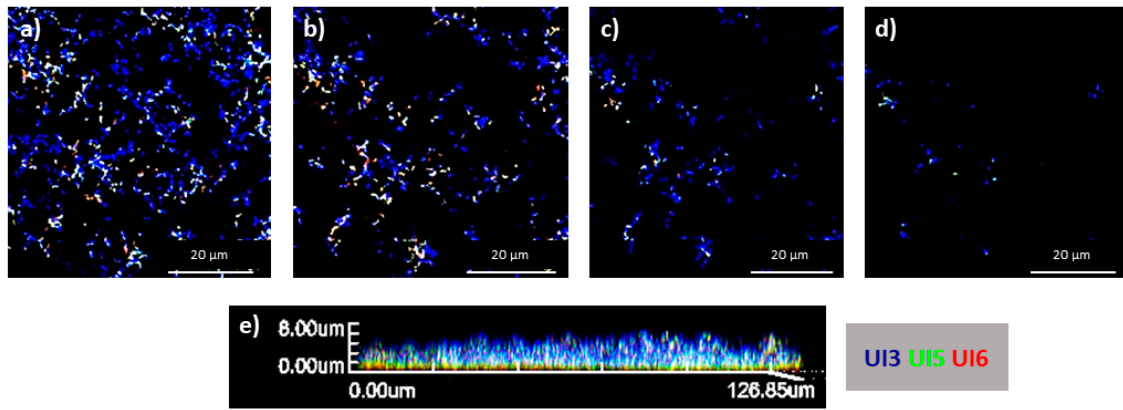

**Figure S5.** Three-dimensional organization of 24 h aged biofilm formed in AUM and in polystyrene coupons by a consortium of three *E. coli* strains (UI3 - blue, UI5 - green and UI6 - red). (a) Examples of CLSM images obtained of the layers within the biofilm at different heights (a = 0  $\mu\text{m}$ ; b = 1  $\mu\text{m}$ ; c = 2  $\mu\text{m}$ ; d = 3  $\mu\text{m}$ ). (e) Cross section of the biofilm.

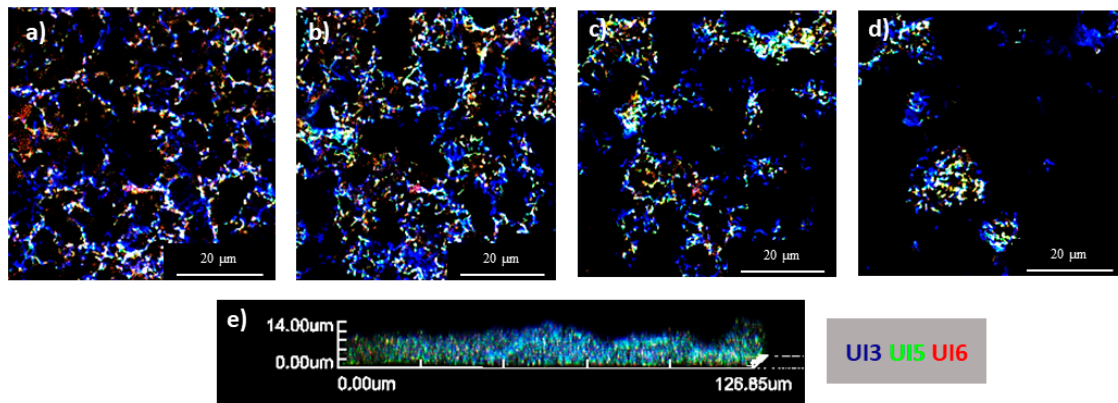

**Figure S6.** Tri-dimensional organization of 48 h aged biofilm formed in AUM and in polystyrene coupons by a consortium of three *E. coli* strains (UI3 - blue, UI5 - green and UI6 - red). (a) Examples of CLSM images obtained of the layers within the biofilm at different heights (a = 0  $\mu\text{m}$ ; b = 2  $\mu\text{m}$ ; c = 4  $\mu\text{m}$ ; d = 6  $\mu\text{m}$ ). (e) Cross section of the biofilm.
